# Supplementary material for: Characterization of brain dystrophins absence and impact in dystrophin-deficient Dmdmdx rat model
Source: PubMed Central journal article supplement (PMC7065776; doi:10.1371/journal.pone.0230083), 2020-03-11
Supplement: pone.0230083.s001.pdf [file pone.0230083.s001.pdf]

# WT

For figure 5A conception

Primary antibody : Dys2, 1/100  
Secondary antibody: Dako P0447 1/5000  
Exposure time : 1 min

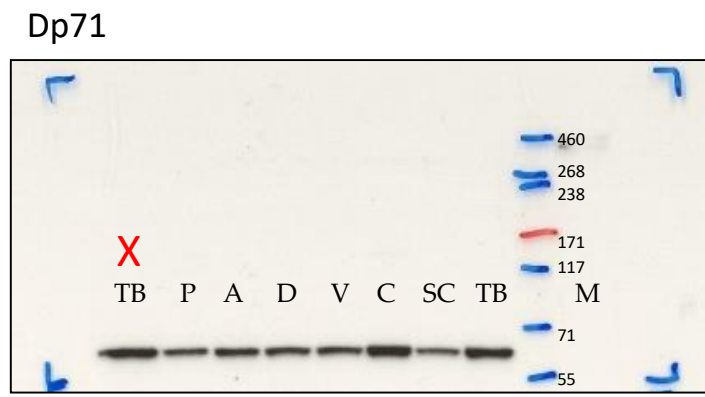

GAPDH  
X

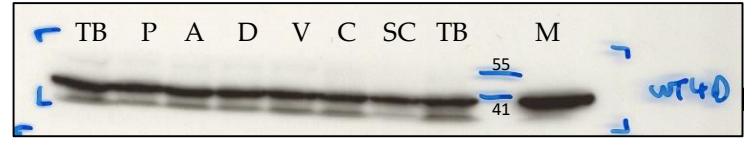

Primary antibody : GAPDH 1/10000  
Secondary antibody: Dako P0449 1/2000  
Exposure time : 1 min

Primary antibody : Dys2, 1/100  
Secondary antibody: Dako P0447 1/5000  
Exposure time : 30 min

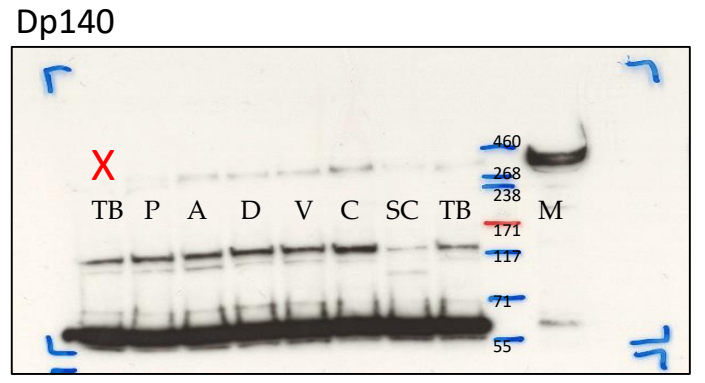

GAPDH  
X

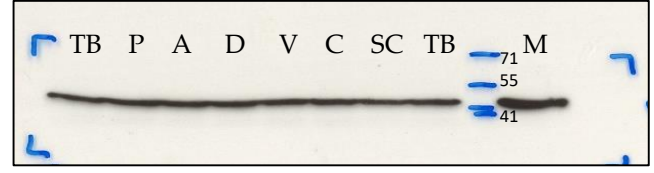

Primary antibody : GAPDH 1/10000  
Secondary antibody: Dako P0449 1/2000  
Exposure time : 5 min

Primary antibody : MANEX 1011C, 1/250  
Secondary antibody: Dako P0447 1/5000  
Exposure time : 3 h

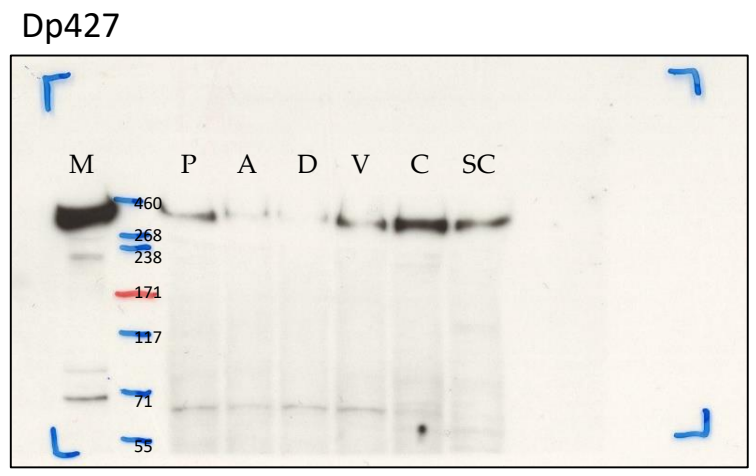

GAPDH

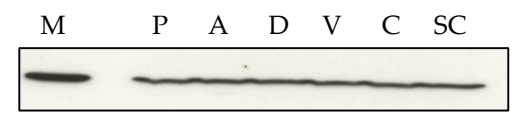

Primary antibody : GAPDH 1/10000  
Secondary antibody: Dako P0449 1/2000  
Exposure time : 5 min

*Dmd<sup>mdx</sup>*

Dp71

Primary antibody : Dys2, 1/100

Secondary antibody: Dako P0447 1/5000

Exposure time : 1 min

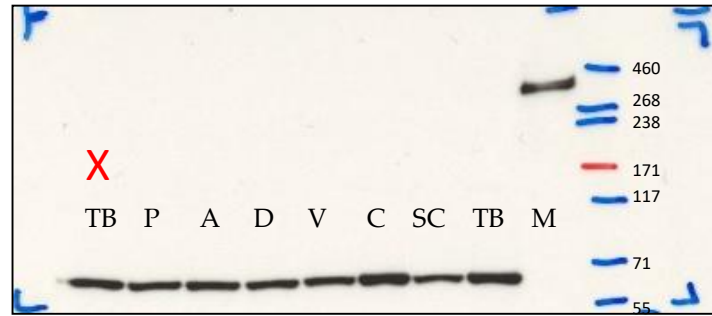

GAPDH

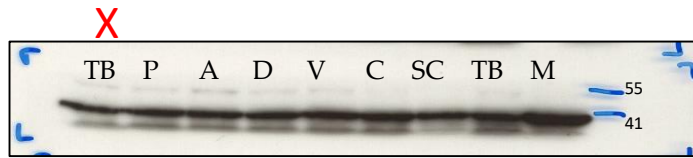

Primary antibody : GAPDH 1/10000

Secondary antibody: Dako P0449 1/2000

Exposure time : 1 min

For figure 5A conception

Dp140

Primary antibody : Dys2, 1/100

Secondary antibody: Dako P0447 1/5000

Exposure time : 30 min

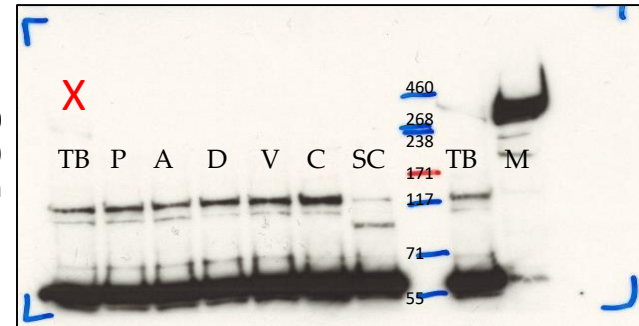

GAPDH

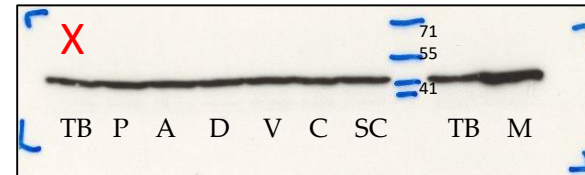

Primary antibody : GAPDH 1/10000

Secondary antibody: Dako P0449 1/2000

Exposure time : 5 min

Dp427

Primary antibody : MANEX 1011C, 1/250

Secondary antibody: Dako P0447 1/5000

Exposure time : 3 h

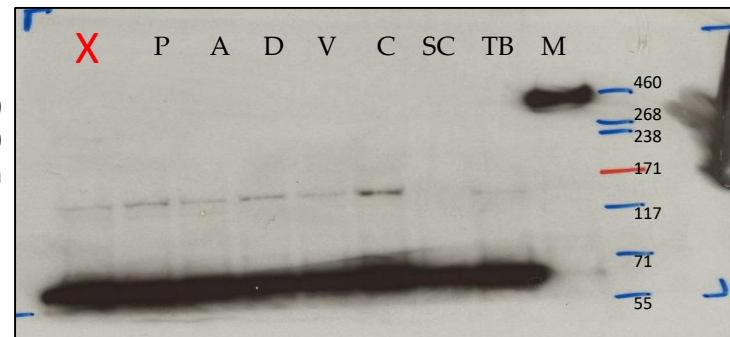

GAPDH

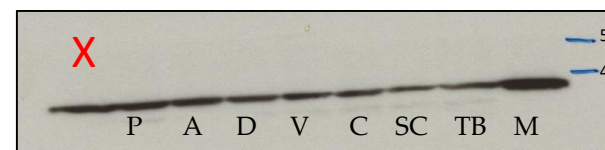

Primary antibody : GAPDH 1/10000

Secondary antibody: Dako P0449 1/2000

Exposure time : 5 min
